# Supplementary material for: Vaccination to prevent T cell subversion can protect against persistent hepacivirus infection
Source: PubMed Central journal article supplement (PMC6405742; doi:10.1038/s41467-019-09105-0), 2019-03-07
Supplement: 41467_2019_9105_MOESM1_ESM.pdf [file 41467_2019_9105_MOESM1_ESM.pdf]

Supplementary Materials for  
**Vaccination to prevent T cell subversion can protect against persistent  
hepacivirus infection**

Hartlage, et al. 2019

**PDF file includes (in order of appearance in text):**

Supplemental Figure 1. Gating strategy for quantification of intracellular cytokines.

Supplemental Table 1. Core-specific MHC class II epitopes.

Supplemental Table 2. List of PCR primers used in study.

Supplemental Figure 2. Gating strategies for analysis of tetramer positive cells.

Supplemental Figure 3. Absence of in vivo killing during acute RHV infection.

Supplemental Figure 4. Immunogenicity of Ad-NSmut and characterization of vaccine-elicited T cell repertoire.

Supplemental Figure 5. Serum ALT values in vaccinated rats.

Supplemental Figure 6. Mapping of NS3<sub>974</sub> class I epitope.

Supplemental Figure 7. RHV-specific T cell response in Ad-null vaccinated rats after virus challenge.

Supplemental Figure 8. RHV-specific CD4<sup>+</sup> T cell responses in depleted rats after virus challenge.

Supplemental Figure 9. Class I epitope evolution in CD4-depleted rats.

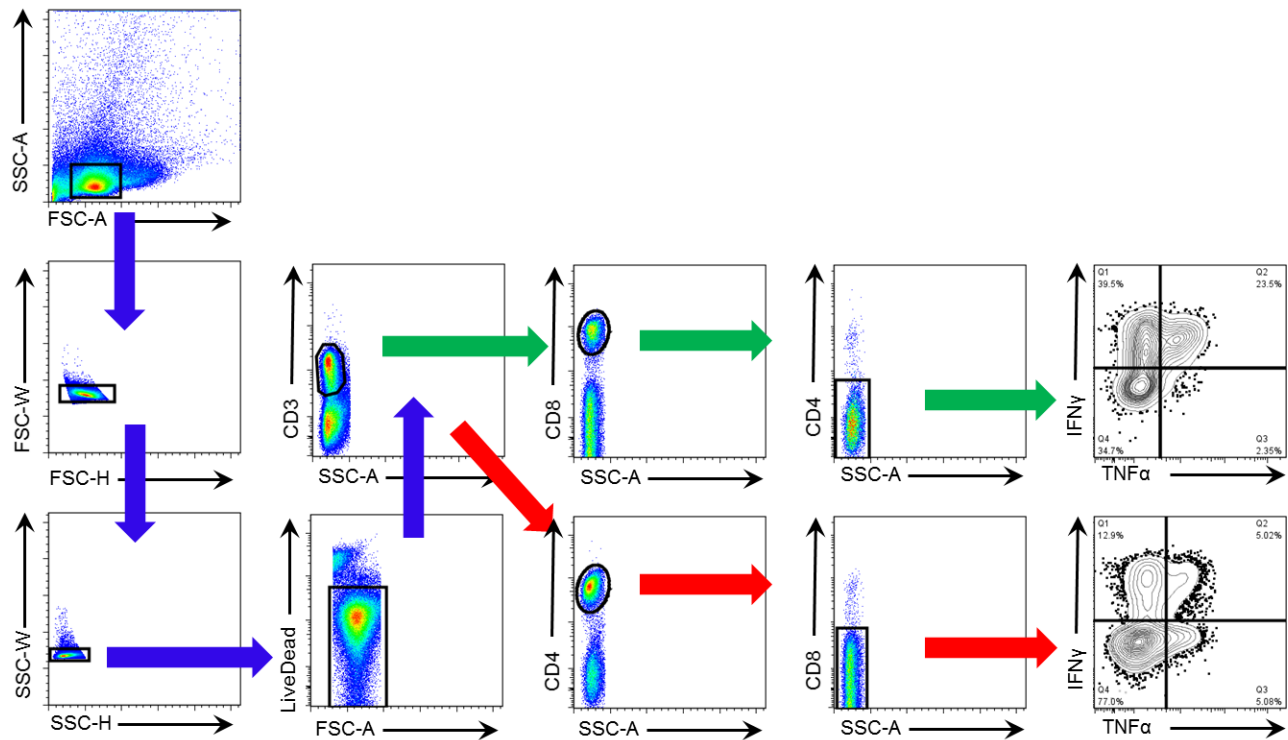

**Supplemental Figure 1. Gating strategy for quantification of intracellular cytokines.** Shown are intrahepatic mononuclear cells after 5-hr PMA/Ionomycin stimulation in the presence of brefeldin A.

**Supplemental Table 1.** Core-specific MHC class II epitopes.

| <b>Peptide</b> | <b>Position</b>     | <b>Sequence</b>    |
|----------------|---------------------|--------------------|
| P9             | Core <sub>57</sub>  | AKRRRRHRRDQGGWRRSP |
| P12            | Core <sub>78</sub>  | VDPYVRQGLQILLPSAAY |
| P13            | Core <sub>85</sub>  | GLQILLPSAAYPVRDPRR |
| P17            | Core <sub>113</sub> | GTLGWTADLLHHVPLVGP |
| P18            | Core <sub>120</sub> | DLLHHVPLVGPLVGHPAR |
| P20            | Core <sub>134</sub> | HPARLICRAVRACEDGIN |
| P22            | Core <sub>148</sub> | DGINSFTGIAGVHLFLIC |

**Supplemental Table 2.** List of PCR primers used in study.

| Name              | Sequence (5'→3')                 |
|-------------------|----------------------------------|
| GNN-F1            | GATTTGTGGAAATAACACGGTGTGCATATTTG |
| GNN-R1            | AACCAGCTGGGTGACGCG               |
| 5'KpnI_NS35B_F    | GATGGGGTACCATGGCCCCCTTCAACTTAAG  |
| 3'EcoRV_NS35B_R   | GGTGGTAAGATATCGAGGTTGAGGGATTTACC |
| RHV_NS3amino-F    | CCGCTGAGGACACTGGTTTCA            |
| RHV_NS3amino-R    | CGGCATGGCACTCGTCCG               |
| RHV_NS3carboxy-F  | CCATGATAACGGCTCAAGGCTC           |
| RHV_NS3carboxy-R  | GTCGCCCGTCAAGTCCCAGG             |
| RHV_NS3amino-F2   | CCGCTGAGGACACTGGTTTCA            |
| RHV_NS3amino-R2   | CGTGGCCGTCGCAAGAAGC              |
| RHV_NS4B-F        | GCTTCCAGCATCCAGGGGTG             |
| RHV_NS4B-R        | CGGGTCGGCAGGCGTAGAGT             |
| RHV_NS5A-F        | CAAGCCACCACACTCAGACAAAC          |
| RHV_NS5A-R        | TGGGATTACGCATCAAGCCG             |
| RHV_NS5Bamino-F   | GCCCACAGACCCAGACACTTTCA          |
| RHV_NS5Bamino-R   | GCTTCATGGCCACTGCGAAT             |
| RHV_NS5Bcarboxy-F | TTACATGACAACCTGTATGCTGG          |
| RHV_NS5Bcarboxy-R | ACATCAGGAGAAGATGAAGGCTAT         |
| NS3aseq-F1        | CCCTAAAGGGCTTACCAGTG             |
| NS3aseq-F2        | TCTTTCTAAGGTGCAGGAGC             |
| NS3cseq-F1        | CATGTTCTAGCGAAGAACC              |
| NS3cseq-F2        | TGATGCCAACATTCAAGCTG             |
| NS4Bseq-F1        | GAAGAATACTTTGCTGAGACGG           |
| NS4Bseq-F2        | CTACAAAGCTAACAACACAGACG          |
| NS5Aseq-F1        | AAGTGGCTGGAAACAGCCTC             |
| NS5Aseq-F2        | CTGTAGGCTGGACTAGTATGGC           |
| NS5Aseq-F3        | TGCACACATGAAAGACATCTCACG         |
| NS5Aseq-F4        | GTGCATCCTGTTCCAGAATC             |
| NS5Bseq-F1        | AGTCGTCTGGATCATGGACC             |
| NS5Bseq-F2        | TGGTGGAGAAGATGGTGCTC             |
| NS5Bcseq-F1       | CATGGTGATGCAAGGTGCTG             |
| NS5Bcseq-F2       | GTGTGTGCAATTCTTACAGCAG           |

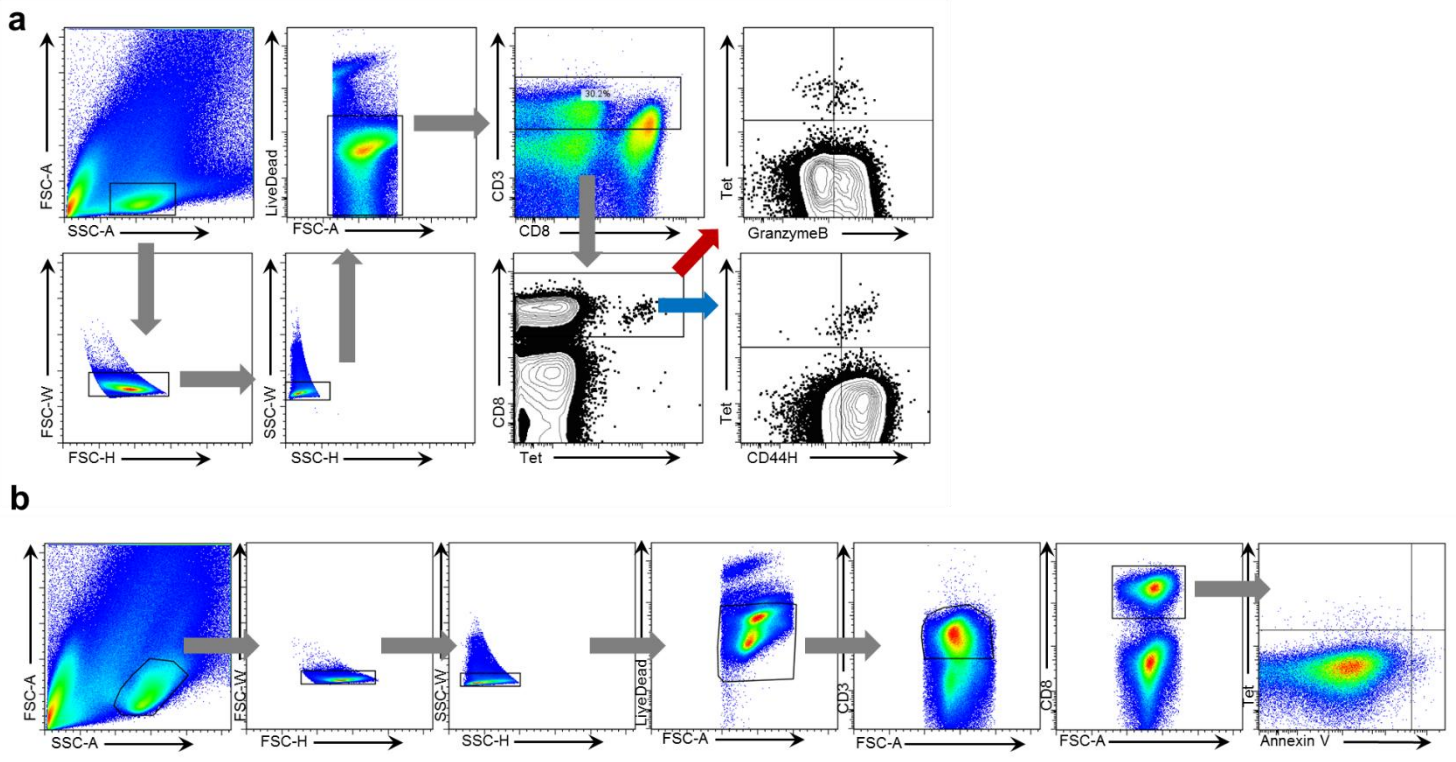

**Supplemental Figure 2. Gating strategies for analysis of tetramer positive cells.** Analysis of tetramer positive cells after staining with markers for CD44H and granzyme B (a) or Annexin V (b).

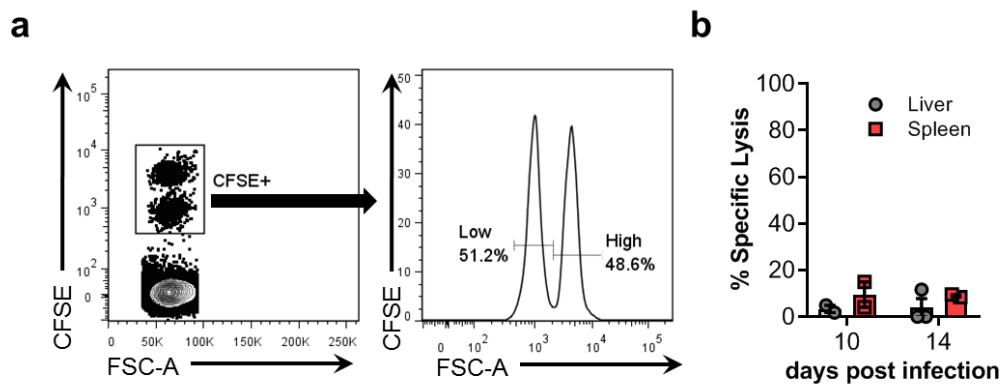

**Supplemental Figure 3. Absence of in vivo killing during acute RHV infection. (a)** Representative FACS plots of CFSE<sup>+</sup> cells in infected liver at 10 days post infection. **(b)** Summary of percent specific lysis of RHV-rn1 peptide-loaded cells at days (d) 10 and 14 post infection in livers (grey circles) and spleens (red squares).

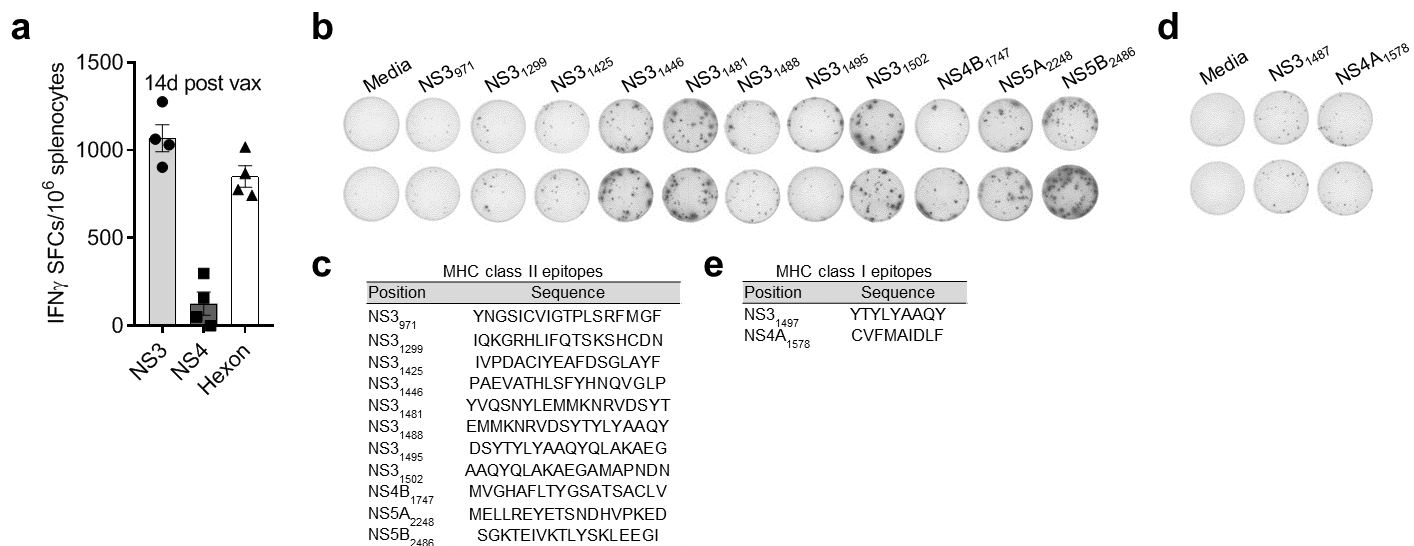

**Supplemental Figure 4. Immunogenicity of Ad-NSmut and characterization of vaccine-elicited T cell repertoire.** Lewis rats were vaccinated intramuscularly with  $5 \times 10^8$  ifu Ad-NSmut. Two weeks after vaccination, splenocytes were harvested for analysis of cellular immunity. **(a)** IFN $\gamma$  ELISpot responses against vaccine insert (NS3, NS4; 2  $\mu$ g/mL) and backbone (Hexon; 0.6 nmol/mL) peptides. Data from  $n=3$  rats per group is shown (mean  $\pm$  SEM). **(b-e)** Splenocytes from four rats were pooled together at equal ratios, magnetically enriched for CD8<sup>pos</sup> and CD8<sup>neg</sup> cells, and used to map MHC class I and II epitopes in the NS3-5B insert by IFN $\gamma$  ELISpot assay. MHC class II epitopes (b and c) were identified by testing individual NS3-4B peptides and NS5B matrix pools. MHC class I epitopes (d and e) for the RT1-A<sup>I</sup> protein of the Lewis rat were screened and confirmed using the SYFPEITHI prediction algorithm. Panels b and d show representative ELISpot responses of identified epitopes in duplicate.

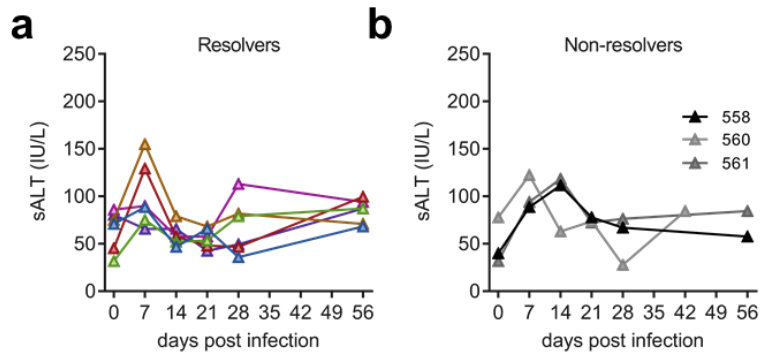

**Supplemental Fig 5. Serum ALT values in vaccinated rats.** Levels of serum ALT (sALT) in (a) resolvers and (b) non-resolvers after RHV infection.



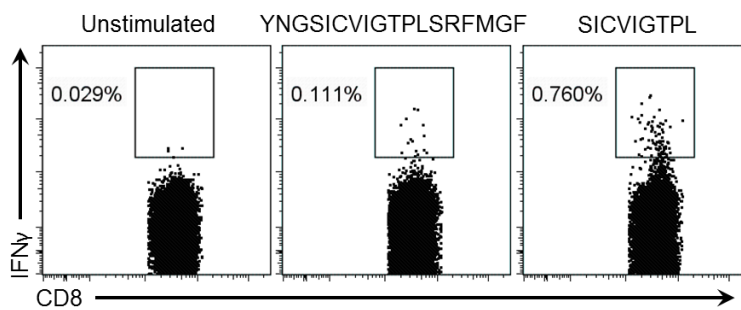

**Supplemental Fig. 6. Mapping of NS3<sub>974</sub> class I epitope.** Flow cytometric analysis of intracellular IFN $\gamma$  production by CD8<sup>+</sup> T cells in immune splenocytes following 5-hr stimulation with untruncated or truncated NS3<sub>974</sub> peptide.

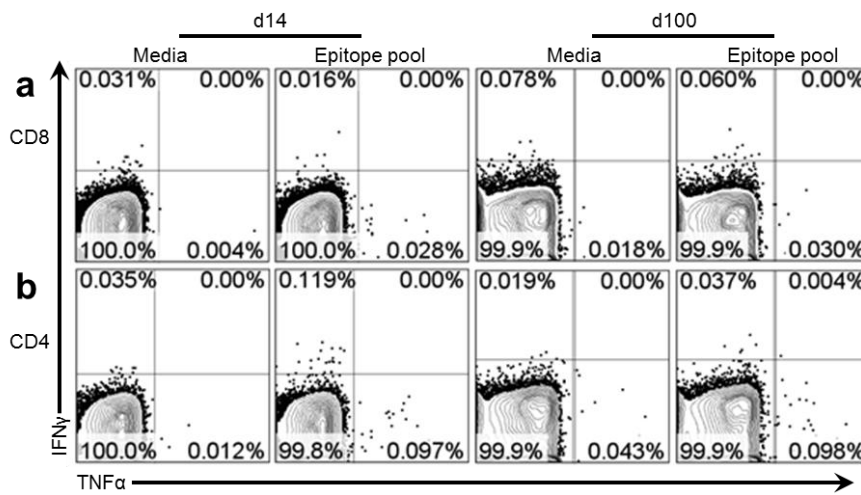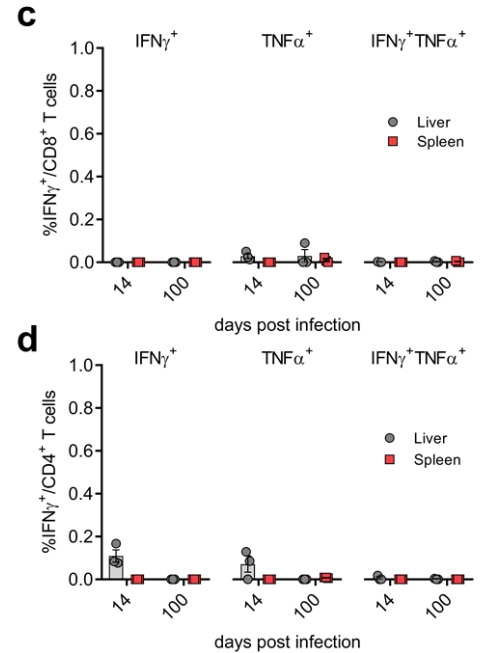

**Extended Figure 7. RHV-specific T cell response in Ad-null vaccinated rats after virus challenge.** Lewis rats were vaccinated intramuscularly with  $5 \times 10^8$  ifu Ad-null. Three weeks after vaccination, rats were challenged intravenously with  $10^6$  genomes RHV. At days 14 and 100 post infection, virus-specific T cell responses were quantified in spleens and livers by flow cytometric analysis following 5-hr stimulation with a pool of MHC class I and II epitopes ( $5 \mu\text{g/mL}$ ). **(a,b)** Representative flow plots of intracellular IFN $\gamma$  and TNF $\alpha$  cytokine production in CD8<sup>+</sup> (a) and CD4<sup>+</sup> (B) T cells from livers of vaccinated rats. **(c,d)** Calculated frequencies of total and dual positive cytokine producers in CD8<sup>+</sup> (c) and CD4<sup>+</sup> (d) T cell compartments following RHV-specific peptide stimulation. Liver, grey circles; spleen, red squares. Data from  $n=3$  rats per group are shown (mean  $\pm$ SEM).

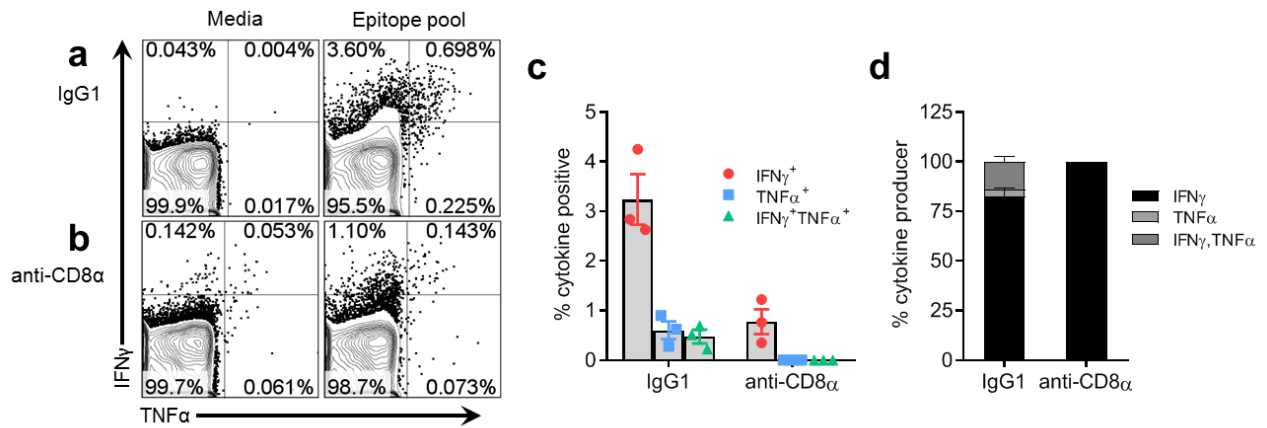

**Supplemental Figure 8. RHV-specific CD4<sup>+</sup> T cell responses in depleted rats after virus challenge.** Lewis rats were vaccinated intramuscularly with  $5 \times 10^8$  ifu Ad-NSmut. Three weeks after vaccination, rats were challenged intravenously with  $10^6$  genomes RHV. At -2 and 5 days post infection, rats were depleted of CD8 $\alpha^+$  cells by antibody or isotype control. At day 9 post infection, CD4<sup>+</sup> T cell responses were quantified in liver by flow cytometric analysis following 5-hr stimulation with a pool of MHC class I and II epitopes (5  $\mu$ g/mL). **(a,b)** Representative flow plots of intracellular IFN $\gamma$  and TNF $\alpha$  cytokine production by intrahepatic CD4<sup>+</sup> T cells in (a) mock and (b) CD8 $\alpha^+$  cell-depleted rats. **(c)** Calculated frequencies of total and dual positive cytokine producing cells in mock and CD8 $\alpha^+$  cell-depleted rats. IFN $\gamma$ , red circles; TNF $\alpha$ , blue squares; IFN $\gamma$ ,TNF $\alpha$ , green triangles. Data from n=3 rats per group are shown (mean  $\pm$ SEM). **(d)** Relative frequency of intrahepatic CD4<sup>+</sup> T cells producing dual or single IFN $\gamma$  or TNF $\alpha$  cytokines. Data from n=3 rats per group are shown (mean  $\pm$ SEM).

| day 21 | NS3 <sub>974</sub> |   |   |   |   |   |   |   | NS3 <sub>1497</sub> |     |   |   |   |   |   |   | NS4A <sub>1578</sub> |   |   |     |   |   |   |   |   |   |   |   |   |
|--------|--------------------|---|---|---|---|---|---|---|---------------------|-----|---|---|---|---|---|---|----------------------|---|---|-----|---|---|---|---|---|---|---|---|---|
|        | S                  | I | C | V | I | G | T | P | L                   | Y   | T | Y | L | A | A | Q | Y                    | C | V | F   | M | A | I | D | L | F |   |   |   |
| 506    | -                  | - | - | - | - | - | - | - | -                   | 506 | - | - | - | - | - | - | -                    | - | - | 506 | - | - | - | - | - | - | - | - | - |
| 507    | -                  | - | - | - | - | - | - | - | -                   | 507 | - | - | - | - | - | - | -                    | - | - | 507 | - | - | - | - | - | - | - | - | - |
| 508    | -                  | - | - | I | - | - | - | - | -                   | 508 | - | - | - | - | - | - | -                    | - | - | 508 | - | - | - | - | - | - | - | - | - |
| 509    | -                  | - | - | - | - | - | - | - | -                   | 509 | - | - | - | - | - | - | -                    | - | - | 509 | - | - | - | - | - | - | - | - | - |

**Supplemental Figure 9. Class I epitope evolution in CD4-depleted rats.** Serum viral RNA in CD4-depleted rats at 21 days post infection was analyzed for presence of mutations in class I-restricted epitopes by consensus PCR sequencing. A single non-synonymous V→I mutation was identified at position 4 in the NS3<sub>974</sub> epitope of serum virus recovered from rat 508.
